# Supplementary material for: Investigating the Interaction Between Prosody and Pragmatics Quantitatively: A Case Study of the Chinese Discourse Marker ni zhidao (“You Know”)
Source: Front Psychol. 2021 Dec 6;12:716791. doi: 10.3389/fpsyg.2021.716791 (PMC8687356; doi:10.3389/fpsyg.2021.716791)
Supplement: Supplementary file 1 [file Data_Sheet_1.CSV]

Position	Variant	Duration	Tempo	Pre-pause	Post-pause	F0	Intensity	Pragmatics
Sentence-initial	Nizhidao	0.294	0.098	0	0	200.437	78.449	Turn-initiating
Sentence-initial	Nizhidao	0.261	0.087	0	0.036	106.316	87.978	Turn-initiating
Sentence-initial	Nizhidao	0.384	0.128	0	0	305.818	79.646	Turn-initiating
Sentence-initial	Nizhidao	0.656	0.164	0	0.114	149.297	73.517	Turn-initiating
Sentence-initial	Nizhidao	0.412	0.137	0	0.108	337.744	79.253	Turn-initiating
Sentence-initial	Nizhidao	0.246	0.082	0	0	117.127	83.02	Turn-initiating
Sentence-initial	Nizhidao	0.419	0.14	0	0.102	159.827	82.316	Turn-initiating
Sentence-initial	Nizhidao	0.139	0.046	0	0	197.542	85.248	Turn-initiating
Sentence-initial	Nizhidao	0.631	0.158	0	0.149	168.564	79.322	Turn-initiating
Sentence-initial	Nizhidao	0.371	0.124	0	0	186.02	79.544	Turn-initiating
Sentence-initial	Nizhidao	0.219	0.073	0	0	176.875	84.096	Turn-initiating
Sentence-initial	Nizhidao	0.307	0.102	0	0	163.539	81.343	Turn-initiating
Sentence-initial	Nizhidao	0.469	0.156	0	0	143.928	79.399	Turn-initiating
Sentence-initial	Nizhidao	0.383	0.128	0	0	152.136	80.368	Turn-initiating
Sentence-initial	Nizhidao	0.361	0.09	0	0.084	306.656	80.733	Turn-initiating
Sentence-initial	Nizhidao	0.245	0.082	0	0	275.229	78.342	Turn-initiating
Sentence-initial	Nizhidao	0.587	0.196	0	0	278.504	84.641	Turn-initiating
Sentence-initial	Nizhidao	0.601	0.15	0	0.051	152.99	77.302	Turn-initiating
Sentence-initial	Nizhidao	0.493	0.121	0	0	273.374	69.324	Turn-initiating
Sentence-initial	Nizhidao	0.583	0.146	0	0	232.359	75.603	Turn-initiating
Sentence-initial	Nizhidao	0.381	0.127	0	0.092	133.245	73.532	Turn-initiating
Sentence-initial	Nizhidao	0.543	0.136	0	0	182.139	71.899	Turn-initiating
Sentence-initial	Nizhidao	0.405	0.135	0	0	247.003	83.254	Turn-initiating
Sentence-initial	Nizhidao	0.434	0.145	0	0	133.506	85.074	Turn-initiating
Sentence-initial	Nizhidao	0.608	0.152	0	0.068	186.13	77.111	Turn-initiating
Sentence-initial	Nizhidao	0.294	0.098	0	0	200.437	78.449	Turn-initiating
Sentence-initial	Nizhidao	0.261	0.087	0	0.036	106.316	87.978	Turn-initiating
Sentence-initial	Nizhidao	0.384	0.128	0	0	305.818	79.646	Turn-initiating
Sentence-initial	Nizhidao	0.656	0.164	0	0.114	149.297	73.517	Turn-initiating
Sentence-initial	Nizhidao	0.412	0.137	0	0.108	337.744	79.253	Turn-initiating
Sentence-initial	Nizhidao	0.246	0.082	0	0	117.127	83.02	Turn-initiating
Sentence-initial	Nizhidao	0.419	0.14	0	0.102	159.827	82.316	Turn-initiating
Sentence-initial	Nizhidao	0.139	0.046	0	0	197.542	85.248	Turn-initiating
Sentence-initial	Nizhidao	0.631	0.158	0	0.149	168.564	79.322	Turn-initiating
Sentence-initial	Nizhidao	0.371	0.124	0	0	186.02	79.544	Turn-initiating
Sentence-initial	Nizhidao	0.219	0.073	0	0	176.875	84.096	Turn-initiating
Sentence-initial	Nizhidao	0.307	0.102	0	0	163.539	81.343	Turn-initiating
Sentence-initial	Nizhidao	0.469	0.156	0	0	143.928	79.399	Turn-initiating
Sentence-initial	Nizhidao	0.383	0.128	0	0	152.136	80.368	Turn-initiating
Sentence-initial	Nizhidao	0.361	0.09	0	0.084	306.656	80.733	Turn-initiating
Sentence-initial	Nizhidao	0.245	0.082	0	0	275.229	78.342	Turn-initiating
Sentence-initial	Nizhidao	0.587	0.196	0	0	278.504	84.641	Turn-initiating
Sentence-initial	Nizhidao	0.601	0.15	0	0.051	152.99	77.302	Turn-initiating
Sentence-initial	Nizhidao	0.493	0.121	0	0	273.374	69.324	Turn-initiating
Sentence-initial	Nizhidao	0.583	0.146	0	0	232.359	75.603	Turn-initiating
Sentence-initial	Nizhidao	0.381	0.127	0	0.092	133.245	73.532	Turn-initiating
Sentence-initial	Nizhidao	0.543	0.136	0	0	182.139	71.899	Turn-initiating
Sentence-initial	Nizhidao	0.405	0.135	0	0	247.003	83.254	Turn-initiating
Sentence-initial	Nizhidao	0.434	0.145	0	0	133.506	85.074	Turn-initiating
Sentence-initial	Nizhidao	0.608	0.152	0	0.068	186.13	77.111	Turn-initiating
Within-clause	Nizhidao	0.479	0.16	0	0	150.616	73.458	Floor-holding
Within-clause	Nizhidao	0.368	0.123	0	0.17	146.917	74.354	Floor-holding
Within-clause	Nizhidao	0.527	0.176	0	0	114.54	72.763	Floor-holding
Within-clause	Nizhidao	0.291	0.097	0.259	0	175.988	79.297	Floor-holding
Within-clause	Nizhidao	0.564	0.188	0	0	221.58	75.542	Floor-holding
Within-clause	Nizhidao	0.319	0.106	0	0	176.633	75.38	Floor-holding
Within-clause	Nizhidao	0.404	0.135	0	0	335.629	75.502	Floor-holding
Within-clause	Nizhidao	0.316	0.105	0	0	144.362	68.647	Floor-holding
Within-clause	Nizhidao	0.275	0.092	0.055	0	134.237	61.117	Floor-holding
Within-clause	Nizhidao	0.4	0.133	0	0	247.301	76.223	Floor-holding
Within-clause	Nizhidao	0.416	0.139	0	0	247.164	69.575	Floor-holding
Within-clause	Nizhidao	0.323	0.108	0.496	0	260.349	77.029	Floor-holding
Within-clause	Nizhidao	0.534	0.178	0	0.131	86.371	74.372	Floor-holding
Within-clause	Nizhidao	0.381	0.127	0	0	112.892	75.53	Floor-holding
Within-clause	Nizhidao	0.384	0.128	0	0.176	120.873	77.676	Floor-holding
Within-clause	Nizhidao	0.544	0.181	0.112	0.56	101.695	74.116	Floor-holding
Within-clause	Nizhidao	0.408	0.136	0	0.104	182.718	79.755	Floor-holding
Within-clause	Nizhidao	0.44	0.147	0.568	0.4	164.643	80.043	Floor-holding
Within-clause	Nizhidao	0.239	0.08	0	0	233.742	87.348	Floor-holding
Within-clause	Nizhidao	0.387	0.129	0	0.095	133.535	86.988	Floor-holding
Within-clause	Nizhidao	0.283	0.094	0	0	108.274	86.23	Floor-holding
Within-clause	Nizhidao	0.224	0.075	0	0	132.269	77.815	Floor-holding
Within-clause	Nizhidao	0.228	0.076	0	0	126.809	73.154	Floor-holding
Within-clause	Nizhidao	0.489	0.122	0	0.107	127.781	71.264	Floor-holding
Within-clause	Nizhidao	0.372	0.124	0.547	0.66	84.259	72.117	Floor-holding
Within-clause	Nizhidao	0.29	0.097	0.497	0.121	99.127	78.855	Floor-holding
Within-clause	Nizhidao	0.335	0.112	0	0	152.792	83.328	Floor-holding
Within-clause	Nizhidao	0.441	0.11	0	0	219.977	68.336	Floor-holding
Within-clause	Nizhidao	0.373	0.124	0	0	246.711	77.746	Floor-holding
Within-clause	Nizhidao	0.475	0.119	0	0.02	166.76	86.02	Floor-holding
Within-clause	Nizhidao	0.28	0.093	0	0	175.8	81.081	Floor-holding
Within-clause	Nizhidao	0.35	0.117	0	0	250.853	75.11	Floor-holding
Within-clause	Nizhidao	0.39	0.13	0	0	211.519	79.616	Floor-holding
Within-clause	Nizhidao	0.438	0.146	0	0	176.01	79.931	Floor-holding
Within-clause	Nizhidao	0.407	0.136	0	0	155.366	82.326	Floor-holding
Within-clause	Nizhidao	0.565	0.141	0	0.144	124.42	76.522	Floor-holding
Within-clause	Nizhidao	0.56	0.14	0.128	0.128	165.272	79.864	Floor-holding
Within-clause	Nizhidao	0.487	0.123	0	0.087	313.151	80.593	Floor-holding
Within-clause	Nizhidao	0.537	0.134	0	0	320.534	77.775	Floor-holding
Within-clause	Nizhidao	0.582	0.146	0	0.128	237.778	78.853	Floor-holding
Within-clause	Nizhidao	0.378	0.126	0	0	333.526	80.632	Floor-holding
Within-clause	Nizhidao	0.335	0.112	0	0	244.95	72.917	Floor-holding
Within-clause	Nizhidao	0.418	0.139	0	0	234.065	73.236	Floor-holding
Within-clause	Nizhidao	0.504	0.168	0	0	205.405	78.551	Floor-holding
Within-clause	Nizhidao	0.614	0.154	0	0	203.545	77.714	Floor-holding
Within-clause	Nizhidao	0.25	0.083	0	0	222.491	76.535	Floor-holding
Within-clause	Nizhidao	0.258	0.086	0	0	314.054	77.899	Floor-holding
Within-clause	Nizhidao	0.353	0.118	0	0	335.551	84.163	Floor-holding
Within-clause	Nizhidao	0.385	0.128	0	0	180.776	76.712	Floor-holding
Within-clause	Nizhidao	0.315	0.105	0	0	336.941	78.17	Floor-holding
Within-clause	Nizhidao	0.197	0.066	0.204	0	115.555	68.708	Floor-holding
Within-clause	Nizhidao	0.53	0.133	0	0	198.516	75.291	Floor-holding
Within-clause	Nizhidao	0.235	0.078	0.617	0	194.492	71.261	Floor-holding
Within-clause	Nizhidao	0.256	0.085	0.084	0	249.731	83.234	Floor-holding
Within-clause	Nizhidao	0.479	0.16	0	0	150.616	73.458	Floor-holding
Within-clause	Nizhidao	0.368	0.123	0	0.17	146.917	74.354	Floor-holding
Within-clause	Nizhidao	0.527	0.176	0	0	114.54	72.763	Floor-holding
Within-clause	Nizhidao	0.291	0.097	0.259	0	175.988	79.297	Floor-holding
Within-clause	Nizhidao	0.564	0.188	0	0	221.58	75.542	Floor-holding
Within-clause	Nizhidao	0.319	0.106	0	0	176.633	75.38	Floor-holding
Within-clause	Nizhidao	0.404	0.135	0	0	335.629	75.502	Floor-holding
Within-clause	Nizhidao	0.316	0.105	0	0	144.362	68.647	Floor-holding
Within-clause	Nizhidao	0.275	0.092	0.055	0	134.237	61.117	Floor-holding
Within-clause	Nizhidao	0.4	0.133	0	0	247.301	76.223	Floor-holding
Within-clause	Nizhidao	0.416	0.139	0	0	247.164	69.575	Floor-holding
Within-clause	Nizhidao	0.323	0.108	0.496	0	260.349	77.029	Floor-holding
Within-clause	Nizhidao	0.534	0.178	0	0.131	86.371	74.372	Floor-holding
Within-clause	Nizhidao	0.381	0.127	0	0	112.892	75.53	Floor-holding
Within-clause	Nizhidao	0.384	0.128	0	0.176	120.873	77.676	Floor-holding
Within-clause	Nizhidao	0.544	0.181	0.112	0.56	101.695	74.116	Floor-holding
Within-clause	Nizhidao	0.408	0.136	0	0.104	182.718	79.755	Floor-holding
Within-clause	Nizhidao	0.44	0.147	0.568	0.4	164.643	80.043	Floor-holding
Within-clause	Nizhidao	0.239	0.08	0	0	233.742	87.348	Floor-holding
Within-clause	Nizhidao	0.387	0.129	0	0.095	133.535	86.988	Floor-holding
Within-clause	Nizhidao	0.283	0.094	0	0	108.274	86.23	Floor-holding
Within-clause	Nizhidao	0.224	0.075	0	0	132.269	77.815	Floor-holding
Within-clause	Nizhidao	0.228	0.076	0	0	126.809	73.154	Floor-holding
Within-clause	Nizhidao	0.489	0.122	0	0.107	127.781	71.264	Floor-holding
Within-clause	Nizhidao	0.372	0.124	0.547	0.66	84.259	72.117	Floor-holding
Within-clause	Nizhidao	0.29	0.097	0.497	0.121	99.127	78.855	Floor-holding
Within-clause	Nizhidao	0.335	0.112	0	0	152.792	83.328	Floor-holding
Within-clause	Nizhidao	0.441	0.11	0	0	219.977	68.336	Floor-holding
Within-clause	Nizhidao	0.373	0.124	0	0	246.711	77.746	Floor-holding
Within-clause	Nizhidao	0.475	0.119	0	0.02	166.76	86.02	Floor-holding
Within-clause	Nizhidao	0.28	0.093	0	0	175.8	81.081	Floor-holding
Within-clause	Nizhidao	0.35	0.117	0	0	250.853	75.11	Floor-holding
Within-clause	Nizhidao	0.39	0.13	0	0	211.519	79.616	Floor-holding
Within-clause	Nizhidao	0.438	0.146	0	0	176.01	79.931	Floor-holding
Within-clause	Nizhidao	0.407	0.136	0	0	155.366	82.326	Floor-holding
Within-clause	Nizhidao	0.565	0.141	0	0.144	124.42	76.522	Floor-holding
Within-clause	Nizhidao	0.56	0.14	0.128	0.128	165.272	79.864	Floor-holding
Within-clause	Nizhidao	0.487	0.123	0	0.087	313.151	80.593	Floor-holding
Within-clause	Nizhidao	0.537	0.134	0	0	320.534	77.775	Floor-holding
Within-clause	Nizhidao	0.582	0.146	0	0.128	237.778	78.853	Floor-holding
Within-clause	Nizhidao	0.378	0.126	0	0	333.526	80.632	Floor-holding
Within-clause	Nizhidao	0.335	0.112	0	0	244.95	72.917	Floor-holding
Within-clause	Nizhidao	0.418	0.139	0	0	234.065	73.236	Floor-holding
Within-clause	Nizhidao	0.504	0.168	0	0	205.405	78.551	Floor-holding
Within-clause	Nizhidao	0.614	0.154	0	0	203.545	77.714	Floor-holding
Within-clause	Nizhidao	0.25	0.083	0	0	222.491	76.535	Floor-holding
Within-clause	Nizhidao	0.258	0.086	0	0	314.054	77.899	Floor-holding
Within-clause	Nizhidao	0.353	0.118	0	0	335.551	84.163	Floor-holding
Within-clause	Nizhidao	0.385	0.128	0	0	180.776	76.712	Floor-holding
Within-clause	Nizhidao	0.315	0.105	0	0	336.941	78.17	Floor-holding
Within-clause	Nizhidao	0.197	0.066	0.204	0	115.555	68.708	Floor-holding
Within-clause	Nizhidao	0.53	0.133	0	0	198.516	75.291	Floor-holding
Within-clause	Nizhidao	0.235	0.078	0.617	0	194.492	71.261	Floor-holding
Within-clause	Nizhidao	0.256	0.085	0.084	0	249.731	83.234	Floor-holding
Between-clause	Nizhidao	0.387	0.129	0	0	209.914	75.524	Coherence-marking
Between-clause	Nizhidao	0.329	0.11	0.424	0	105.234	76.746	Coherence-marking
Between-clause	Nizhidao	0.639	0.16	0.248	0	149.668	82.135	Coherence-marking
Between-clause	Nizhidao	0.535	0.107	0.108	0.672	102.074	68.193	Coherence-marking
Between-clause	Nizhidao	0.322	0.081	0.312	0	107.552	67.897	Coherence-marking
Between-clause	Nizhidao	0.45	0.113	0.8	0	150.48	65.907	Coherence-marking
Between-clause	Nizhidao	0.572	0.143	0	0.501	92.647	69.544	Coherence-marking
Between-clause	Nizhidao	0.385	0.096	0.255	0.288	116.434	71.416	Coherence-marking
Between-clause	Nizhidao	0.293	0.098	0	0	136.243	69.995	Coherence-marking
Between-clause	Nizhidao	0.328	0.109	1.056	0	168.379	77.78	Coherence-marking
Between-clause	Nizhidao	0.313	0.104	1.321	0	147.856	78.057	Coherence-marking
Between-clause	Nizhidao	0.257	0.086	0	0	179.306	71.395	Coherence-marking
Between-clause	Nizhidao	0.432	0.108	0	0.37	149.308	69.636	Coherence-marking
Between-clause	Nizhidao	0.715	0.208	0.372	0.147	233.267	78.909	Coherence-marking
Between-clause	Nizhidao	0.481	0.12	0	0.517	84.806	86.568	Coherence-marking
Between-clause	Nizhidao	0.259	0.086	0	0	157.869	65.322	Coherence-marking
Between-clause	Nizhidao	0.535	0.178	0.565	0	255.64	75.544	Coherence-marking
Between-clause	Nizhidao	0.292	0.097	0.569	0	137.427	81.962	Coherence-marking
Between-clause	Nizhidao	0.194	0.049	0	0.082	129.859	56.614	Coherence-marking
Between-clause	Nizhidao	0.339	0.085	0	0.72	203.345	70.524	Coherence-marking
Between-clause	Nizhidao	0.3	0.1	0.688	0	143.754	89.667	Coherence-marking
Between-clause	Nizhidao	0.448	0.112	0.146	0.704	85.321	63.759	Coherence-marking
Between-clause	Nizhidao	0.213	0.071	0.686	0.059	88.178	62.582	Coherence-marking
Between-clause	Nizhidao	0.373	0.124	0	0.744	94.335	64.998	Coherence-marking
Between-clause	Nizhidao	0.702	0.168	0.325	0.52	83.182	74.512	Coherence-marking
Between-clause	Nizhidao	0.399	0.1	0	0.368	122.916	84.114	Coherence-marking
Between-clause	Nizhidao	0.288	0.072	0.108	0.082	74.666	72.82	Coherence-marking
Between-clause	Nizhidao	0.346	0.115	0.68	0.062	139.159	77.677	Coherence-marking
Between-clause	Nizhidao	0.336	0.112	0.062	0.296	123.583	77.622	Coherence-marking
Between-clause	Nizhidao	0.457	0.152	0.239	0.545	110.335	80.913	Coherence-marking
Between-clause	Nizhidao	0.38	0.127	0	0.329	247.246	68.571	Coherence-marking
Between-clause	Nizhidao	0.303	0.076	0.931	0.847	73.72	56.427	Coherence-marking
Between-clause	Nizhidao	0.241	0.06	0.83	0.065	88.53	60.036	Coherence-marking
Between-clause	Nizhidao	0.266	0.087	1.375	0.39	89.492	61.553	Coherence-marking
Between-clause	Nizhidao	0.266	0.087	1.16	0.526	81.726	67.196	Coherence-marking
Between-clause	Nizhidao	0.228	0.076	1.257	0.734	91.6	67.046	Coherence-marking
Between-clause	Nizhidao	0.412	0.105	1.571	0.628	101.044	70.698	Coherence-marking
Between-clause	Nizhidao	0.275	0.092	1.536	0.245	91.115	73.327	Coherence-marking
Between-clause	Nizhidao	0.247	0.082	0.864	0	216.097	81.274	Coherence-marking
Between-clause	Nizhidao	0.614	0.154	0.672	0	113.391	70.986	Coherence-marking
Between-clause	Nizhidao	0.326	0.109	0.24	0	85.416	69.825	Coherence-marking
Between-clause	Nizhidao	0.289	0.096	0	0.68	90.466	69.278	Coherence-marking
Between-clause	Nizhidao	0.656	0.164	0	0.813	95.501	69.056	Coherence-marking
Between-clause	Nizhidao	0.417	0.104	1.032	0	97.475	70.862	Coherence-marking
Between-clause	Nizhidao	0.432	0.108	0.768	0.776	86.158	78.265	Coherence-marking
Between-clause	Nizhidao	0.325	0.081	0.384	0.776	86.682	78.265	Coherence-marking
Between-clause	Nizhidao	0.312	0.104	1.152	0	82.237	76.954	Coherence-marking
Between-clause	Nizhidao	0.651	0.163	0	0	105.134	78.845	Coherence-marking
Between-clause	Nizhidao	0.504	0.126	1.04	0.224	84.503	78.573	Coherence-marking
Between-clause	Nizhidao	0.357	0.119	1.311	0	193.539	82.581	Coherence-marking
Between-clause	Nizhidao	0.397	0.132	0	0.741	106.495	79.4	Coherence-marking
Between-clause	Nizhidao	0.469	0.156	0	0	133.562	78.257	Coherence-marking
Between-clause	Nizhidao	0.229	0.076	0.776	0	87.955	79.034	Coherence-marking
Between-clause	Nizhidao	0.467	0.117	0.912	0	82.173	78.772	Coherence-marking
Between-clause	Nizhidao	0.307	0.102	0	0	132.615	83.318	Coherence-marking
Between-clause	Nizhidao	0.357	0.119	0.784	0	178.478	82.781	Coherence-marking
Between-clause	Nizhidao	0.451	0.113	0	0.098	103.063	75.189	Coherence-marking
Between-clause	Nizhidao	0.273	0.091	0.491	0	182.1	84.526	Coherence-marking
Between-clause	Nizhidao	0.375	0.094	0	0.474	125.848	80.81	Coherence-marking
Between-clause	Nizhidao	0.278	0.093	0.448	0	175.952	83.274	Coherence-marking
Between-clause	Nizhidao	0.439	0.11	0.12	0.343	91.713	77.314	Coherence-marking
Between-clause	Nizhidao	0.427	0.107	0.097	0	117.555	81.158	Coherence-marking
Between-clause	Nizhidao	0.366	0.092	0	0	101.121	80.407	Coherence-marking
Between-clause	Nizhidao	0.464	0.116	1.112	0.48	159.805	78.765	Coherence-marking
Between-clause	Nizhidao	0.282	0.094	0	0	175.718	79.197	Coherence-marking
Between-clause	Nizhidao	0.656	0.164	0.112	0.28	106.585	75.556	Coherence-marking
Between-clause	Nizhidao	0.728	0.163	0.232	0.392	114.51	77.14	Coherence-marking
Between-clause	Nizhidao	0.5	0.125	0.111	0.392	91.516	78.714	Coherence-marking
Between-clause	Nizhidao	0.455	0.114	0.256	0	123.781	80.533	Coherence-marking
Between-clause	Nizhidao	0.368	0.092	0.208	0.336	110.859	79.59	Coherence-marking
Between-clause	Nizhidao	0.539	0.135	0	0.062	236.517	69.923	Coherence-marking
Between-clause	Nizhidao	0.367	0.122	0.141	0	228.428	76.484	Coherence-marking
Between-clause	Nizhidao	0.532	0.173	0	0	199.718	68.404	Coherence-marking
Between-clause	Nizhidao	0.776	0.154	0	0.303	244.934	77.487	Coherence-marking
Between-clause	Nizhidao	0.583	0.144	0	0.184	341.28	78.309	Coherence-marking
Between-clause	Nizhidao	0.526	0.132	0	0	163.926	79.705	Coherence-marking
Between-clause	Nizhidao	0.49	0.163	0	0	188.831	71.234	Coherence-marking
Between-clause	Nizhidao	0.534	0.178	0.299	0	248.031	75.306	Coherence-marking
Between-clause	Nizhidao	0.297	0.074	0	0	105.585	72.478	Coherence-marking
Between-clause	Nizhidao	0.368	0.123	0.367	0	95.793	83.754	Coherence-marking
Between-clause	Nizhidao	0.501	0.125	0	0.24	96.815	78.678	Coherence-marking
Between-clause	Nizhidao	0.323	0.108	0.68	0	128.9	81.821	Coherence-marking
Between-clause	Nizhidao	0.517	0.129	0	0.104	230.422	67.25	Coherence-marking
Between-clause	Nizhidao	0.452	0.113	0	0.626	95.679	75.449	Coherence-marking
Between-clause	Nizhidao	0.416	0.137	0.544	0.432	124.804	75.9	Coherence-marking
Between-clause	Nizhidao	0.387	0.129	0	0	209.914	75.524	Coherence-marking
Between-clause	Nizhidao	0.329	0.11	0.424	0	105.234	76.746	Coherence-marking
Between-clause	Nizhidao	0.639	0.16	0.248	0	149.668	82.135	Coherence-marking
Between-clause	Nizhidao	0.535	0.107	0.108	0.672	102.074	68.193	Coherence-marking
Between-clause	Nizhidao	0.322	0.081	0.312	0	107.552	67.897	Coherence-marking
Between-clause	Nizhidao	0.45	0.113	0.8	0	150.48	65.907	Coherence-marking
Between-clause	Nizhidao	0.572	0.143	0	0.501	92.647	69.544	Coherence-marking
Between-clause	Nizhidao	0.385	0.096	0.255	0.288	116.434	71.416	Coherence-marking
Between-clause	Nizhidao	0.293	0.098	0	0	136.243	69.995	Coherence-marking
Between-clause	Nizhidao	0.328	0.109	1.056	0	168.379	77.78	Coherence-marking
Between-clause	Nizhidao	0.313	0.104	1.321	0	147.856	78.057	Coherence-marking
Between-clause	Nizhidao	0.257	0.086	0	0	179.306	71.395	Coherence-marking
Between-clause	Nizhidao	0.432	0.108	0	0.37	149.308	69.636	Coherence-marking
Between-clause	Nizhidao	0.715	0.208	0.372	0.147	233.267	78.909	Coherence-marking
Between-clause	Nizhidao	0.481	0.12	0	0.517	84.806	86.568	Coherence-marking
Between-clause	Nizhidao	0.259	0.086	0	0	157.869	65.322	Coherence-marking
Between-clause	Nizhidao	0.535	0.178	0.565	0	255.64	75.544	Coherence-marking
Between-clause	Nizhidao	0.292	0.097	0.569	0	137.427	81.962	Coherence-marking
Between-clause	Nizhidao	0.194	0.049	0	0.082	129.859	56.614	Coherence-marking
Between-clause	Nizhidao	0.339	0.085	0	0.72	203.345	70.524	Coherence-marking
Between-clause	Nizhidao	0.3	0.1	0.688	0	143.754	89.667	Coherence-marking
Between-clause	Nizhidao	0.448	0.112	0.146	0.704	85.321	63.759	Coherence-marking
Between-clause	Nizhidao	0.213	0.071	0.686	0.059	88.178	62.582	Coherence-marking
Between-clause	Nizhidao	0.373	0.124	0	0.744	94.335	64.998	Coherence-marking
Between-clause	Nizhidao	0.702	0.168	0.325	0.52	83.182	74.512	Coherence-marking
Between-clause	Nizhidao	0.399	0.1	0	0.368	122.916	84.114	Coherence-marking
Between-clause	Nizhidao	0.288	0.072	0.108	0.082	74.666	72.82	Coherence-marking
Between-clause	Nizhidao	0.346	0.115	0.68	0.062	139.159	77.677	Coherence-marking
Between-clause	Nizhidao	0.336	0.112	0.062	0.296	123.583	77.622	Coherence-marking
Between-clause	Nizhidao	0.457	0.152	0.239	0.545	110.335	80.913	Coherence-marking
Between-clause	Nizhidao	0.38	0.127	0	0.329	247.246	68.571	Coherence-marking
Between-clause	Nizhidao	0.303	0.076	0.931	0.847	73.72	56.427	Coherence-marking
Between-clause	Nizhidao	0.241	0.06	0.83	0.065	88.53	60.036	Coherence-marking
Between-clause	Nizhidao	0.266	0.087	1.375	0.39	89.492	61.553	Coherence-marking
Between-clause	Nizhidao	0.266	0.087	1.16	0.526	81.726	67.196	Coherence-marking
Between-clause	Nizhidao	0.228	0.076	1.257	0.734	91.6	67.046	Coherence-marking
Between-clause	Nizhidao	0.412	0.105	1.571	0.628	101.044	70.698	Coherence-marking
Between-clause	Nizhidao	0.275	0.092	1.536	0.245	91.115	73.327	Coherence-marking
Between-clause	Nizhidao	0.247	0.082	0.864	0	216.097	81.274	Coherence-marking
Between-clause	Nizhidao	0.614	0.154	0.672	0	113.391	70.986	Coherence-marking
Between-clause	Nizhidao	0.326	0.109	0.24	0	85.416	69.825	Coherence-marking
Between-clause	Nizhidao	0.289	0.096	0	0.68	90.466	69.278	Coherence-marking
Between-clause	Nizhidao	0.656	0.164	0	0.813	95.501	69.056	Coherence-marking
Between-clause	Nizhidao	0.417	0.104	1.032	0	97.475	70.862	Coherence-marking
Between-clause	Nizhidao	0.432	0.108	0.768	0.776	86.158	78.265	Coherence-marking
Between-clause	Nizhidao	0.325	0.081	0.384	0.776	86.682	78.265	Coherence-marking
Between-clause	Nizhidao	0.312	0.104	1.152	0	82.237	76.954	Coherence-marking
Between-clause	Nizhidao	0.651	0.163	0	0	105.134	78.845	Coherence-marking
Between-clause	Nizhidao	0.504	0.126	1.04	0.224	84.503	78.573	Coherence-marking
Between-clause	Nizhidao	0.357	0.119	1.311	0	193.539	82.581	Coherence-marking
Between-clause	Nizhidao	0.397	0.132	0	0.741	106.495	79.4	Coherence-marking
Between-clause	Nizhidao	0.469	0.156	0	0	133.562	78.257	Coherence-marking
Between-clause	Nizhidao	0.229	0.076	0.776	0	87.955	79.034	Coherence-marking
Between-clause	Nizhidao	0.467	0.117	0.912	0	82.173	78.772	Coherence-marking
Between-clause	Nizhidao	0.307	0.102	0	0	132.615	83.318	Coherence-marking
Between-clause	Nizhidao	0.357	0.119	0.784	0	178.478	82.781	Coherence-marking
Between-clause	Nizhidao	0.451	0.113	0	0.098	103.063	75.189	Coherence-marking
Between-clause	Nizhidao	0.273	0.091	0.491	0	182.1	84.526	Coherence-marking
Between-clause	Nizhidao	0.375	0.094	0	0.474	125.848	80.81	Coherence-marking
Between-clause	Nizhidao	0.278	0.093	0.448	0	175.952	83.274	Coherence-marking
Between-clause	Nizhidao	0.439	0.11	0.12	0.343	91.713	77.314	Coherence-marking
Between-clause	Nizhidao	0.427	0.107	0.097	0	117.555	81.158	Coherence-marking
Between-clause	Nizhidao	0.366	0.092	0	0	101.121	80.407	Coherence-marking
Between-clause	Nizhidao	0.464	0.116	1.112	0.48	159.805	78.765	Coherence-marking
Between-clause	Nizhidao	0.282	0.094	0	0	175.718	79.197	Coherence-marking
Between-clause	Nizhidao	0.656	0.164	0.112	0.28	106.585	75.556	Coherence-marking
Between-clause	Nizhidao	0.728	0.163	0.232	0.392	114.51	77.14	Coherence-marking
Between-clause	Nizhidao	0.5	0.125	0.111	0.392	91.516	78.714	Coherence-marking
Between-clause	Nizhidao	0.455	0.114	0.256	0	123.781	80.533	Coherence-marking
Between-clause	Nizhidao	0.368	0.092	0.208	0.336	110.859	79.59	Coherence-marking
Between-clause	Nizhidao	0.539	0.135	0	0.062	236.517	69.923	Coherence-marking
Between-clause	Nizhidao	0.367	0.122	0.141	0	228.428	76.484	Coherence-marking
Between-clause	Nizhidao	0.532	0.173	0	0	199.718	68.404	Coherence-marking
Between-clause	Nizhidao	0.776	0.154	0	0.303	244.934	77.487	Coherence-marking
Between-clause	Nizhidao	0.583	0.144	0	0.184	341.28	78.309	Coherence-marking
Between-clause	Nizhidao	0.526	0.132	0	0	163.926	79.705	Coherence-marking
Between-clause	Nizhidao	0.49	0.163	0	0	188.831	71.234	Coherence-marking
Between-clause	Nizhidao	0.534	0.178	0.299	0	248.031	75.306	Coherence-marking
Between-clause	Nizhidao	0.297	0.074	0	0	105.585	72.478	Coherence-marking
Between-clause	Nizhidao	0.368	0.123	0.367	0	95.793	83.754	Coherence-marking
Between-clause	Nizhidao	0.501	0.125	0	0.24	96.815	78.678	Coherence-marking
Between-clause	Nizhidao	0.323	0.108	0.68	0	128.9	81.821	Coherence-marking
Between-clause	Nizhidao	0.517	0.129	0	0.104	230.422	67.25	Coherence-marking
Between-clause	Nizhidao	0.452	0.113	0	0.626	95.679	75.449	Coherence-marking
Between-clause	Nizhidao	0.416	0.137	0.544	0.432	124.804	75.9	Coherence-marking
Sentence-final	Nizhidao	0.289	0.072	0.109	0	174.037	79.594	Emotion-projecting
Sentence-final	Nizhidao	0.326	0.092	0	0	275.709	78.632	Emotion-projecting
Sentence-final	Nizhidao	0.63	0.158	0	0	171.154	78.954	Emotion-projecting
Sentence-final	Nizhidao	0.743	0.193	0.358	0	122.507	76.24	Emotion-projecting
Sentence-final	Nizhidao	0.381	0.127	0	0	234.519	74.612	Emotion-projecting
Sentence-final	Nizhidao	0.443	0.111	0	0	95.196	67.171	Emotion-projecting
Sentence-final	Nizhidao	0.462	0.116	0.088	0	174.567	60.498	Emotion-projecting
Sentence-final	Nizhidao	0.316	0.105	0.448	0	86.453	58.863	Emotion-projecting
Sentence-final	Nizhidao	0.373	0.093	0	0	61.026	70.528	Emotion-projecting
Sentence-final	Nizhidao	0.399	0.1	0	0	95.994	80.106	Emotion-projecting
Sentence-final	Nizhidao	0.41	0.103	0	0	87.837	79.88	Emotion-projecting
Sentence-final	Nizhidao	0.367	0.092	0.643	0	84.246	77.318	Emotion-projecting
Sentence-final	Nizhidao	0.452	0.113	0	0	159.608	81.664	Emotion-projecting
Sentence-final	Nizhidao	0.604	0.151	0	0	76.695	74.074	Emotion-projecting
Sentence-final	Nizhidao	0.41	0.103	1.497	0	97.124	61.037	Emotion-projecting
Sentence-final	Nizhidao	0.361	0.09	0.836	0	86.207	61.187	Emotion-projecting
Sentence-final	Nizhidao	0.28	0.093	0.68	0	135.553	74.73	Emotion-projecting
Sentence-final	Nizhidao	0.427	0.107	0	0	149.036	73.458	Emotion-projecting
Sentence-final	Nizhidao	0.17	0.057	0.926	0	78.64	58.178	Emotion-projecting
Sentence-final	Nizhidao	0.123	0.031	0.865	0	103.352	54.14	Emotion-projecting
Sentence-final	Nizhidao	0.777	0.194	0	0	82.474	55.236	Emotion-projecting
Sentence-final	Nizhidao	0.394	0.099	0.968	0	113.786	78.616	Emotion-projecting
Sentence-final	Nizhidao	0.191	0.048	0	0	149.797	76.233	Emotion-projecting
Sentence-final	Nizhidao	0.247	0.062	0.831	0	96.51	62.274	Emotion-projecting
Sentence-final	Nizhidao	0.255	0.084	1.026	0	84.128	53.83	Emotion-projecting
Sentence-final	Nizhidao	0.222	0.074	0.968	0	83.371	56.073	Emotion-projecting
Sentence-final	Nizhidao	0.217	0.072	0.773	0	88.141	58.79	Emotion-projecting
Sentence-final	Nizhidao	0.307	0.102	1.264	0	87.253	58.653	Emotion-projecting
Sentence-final	Nizhidao	0.283	0.094	1.068	0	92.928	62.313	Emotion-projecting
Sentence-final	Nizhidao	0.256	0.064	0	0	85.685	59.421	Emotion-projecting
Sentence-final	Nizhidao	0.263	0.066	0.543	0	83.989	57.536	Emotion-projecting
Sentence-final	Nizhidao	0.282	0.094	0.883	0	82.458	58.265	Emotion-projecting
Sentence-final	Nizhidao	0.18	0.045	1.486	0	81.219	55.037	Emotion-projecting
Sentence-final	Nizhidao	0.257	0.064	1.568	0	90.964	60.874	Emotion-projecting
Sentence-final	Nizhidao	0.354	0.089	1.601	0	90.186	71.964	Emotion-projecting
Sentence-final	Nizhidao	0.451	0.113	0	0	105.444	74.437	Emotion-projecting
Sentence-final	Nizhidao	0.295	0.074	1.042	0	99.942	75.137	Emotion-projecting
Sentence-final	Nizhidao	0.428	0.143	0.147	0	141.715	70.233	Emotion-projecting
Sentence-final	Nizhidao	0.601	0.2	0.885	0	115.417	86.745	Emotion-projecting
Sentence-final	Nizhidao	0.325	0.081	0	0	88.134	73.47	Emotion-projecting
Sentence-final	Nizhidao	0.353	0.118	0.504	0	95.593	71.535	Emotion-projecting
Sentence-final	Nizhidao	0.365	0.091	0.616	0	84.731	71.218	Emotion-projecting
Sentence-final	Nizhidao	0.508	0.169	0.965	0	131.863	70.213	Emotion-projecting
Sentence-final	Nizhidao	0.235	0.059	0.72	0	240.547	82.15	Emotion-projecting
Sentence-final	Nizhidao	0.277	0.092	0.48	0	83.822	79.665	Emotion-projecting
Sentence-final	Nizhidao	0.579	0.145	0	0	94.01	77.768	Emotion-projecting
Sentence-final	Nizhidao	0.366	0.122	0	0	123.828	76.949	Emotion-projecting
Sentence-final	Nizhidao	0.526	0.157	1	0	90.685	78.875	Emotion-projecting
Sentence-final	Nizhidao	0.407	0.102	0	0	103.25	78.602	Emotion-projecting
Sentence-final	Nizhidao	0.513	0.128	0.318	0	118.785	69.511	Emotion-projecting
Sentence-final	Nizhidao	0.46	0.153	0.141	0	121.118	80.422	Emotion-projecting
Sentence-final	Nizhidao	0.59	0.148	0.142	0	227.856	79.469	Emotion-projecting
Sentence-final	Nizhidao	0.59	0.148	0	0	106.006	75.847	Emotion-projecting
Sentence-final	Nizhidao	0.695	0.174	0	0	177.954	82.375	Emotion-projecting
Sentence-final	Nizhidao	0.545	0.136	0	0	109.047	77.369	Emotion-projecting
Sentence-final	Nizhidao	0.367	0.092	0	0	171.484	83.039	Emotion-projecting
Sentence-final	Nizhidao	0.655	0.164	0	0	159.319	83.851	Emotion-projecting
Sentence-final	Nizhidao	0.558	0.14	0	0	89.187	75.658	Emotion-projecting
Sentence-final	Nizhidao	0.387	0.097	0	0	148.748	67.198	Emotion-projecting
Sentence-final	Nizhidao	0.699	0.175	0	0	184.213	70.477	Emotion-projecting
Sentence-final	Nizhidao	0.465	0.116	0	0	183.095	70.632	Emotion-projecting
Sentence-final	Nizhidao	0.6	0.15	0	0	186.783	64.477	Emotion-projecting
Sentence-final	Nizhidao	0.674	0.169	0	0	183.176	67.797	Emotion-projecting
Sentence-final	Nizhidao	0.481	0.12	0	0	195.8	67.787	Emotion-projecting
Sentence-final	Nizhidao	0.515	0.129	0.141	0	228.428	76.484	Emotion-projecting
Sentence-final	Nizhidao	0.471	0.118	0	0	179.789	76.61	Emotion-projecting
Sentence-final	Nizhidao	0.224	0.056	0	0	186.524	69.299	Emotion-projecting
Sentence-final	Nizhidao	0.505	0.126	0	0	235.728	73.794	Emotion-projecting
Sentence-final	Nizhidao	0.362	0.091	0	0	100.291	55.632	Emotion-projecting
Sentence-final	Nizhidao	0.385	0.096	0	0	103.095	51.417	Emotion-projecting
Sentence-final	Nizhidao	0.296	0.074	0	0	109.137	57.415	Emotion-projecting
Sentence-final	Nizhidao	0.362	0.091	0	0	91.018	56.132	Emotion-projecting
Sentence-final	Nizhidao	0.368	0.092	0.32	0	149.239	68.004	Emotion-projecting
Sentence-final	Nizhidao	0.364	0.091	0	0	177.578	63.064	Emotion-projecting
Sentence-final	Nizhidao	0.252	0.063	0	0	101.044	62.627	Emotion-projecting
Sentence-final	Nizhidao	0.615	0.154	0	0	259.008	87.427	Emotion-projecting
Sentence-final	Nizhidao	0.45	0.113	0	0	89.898	81.366	Emotion-projecting
Sentence-final	Nizhidao	0.687	0.199	0	0	244.352	74.408	Emotion-projecting
Sentence-final	Nizhidao	0.373	0.093	0.159	0	239.422	81.718	Emotion-projecting
Sentence-final	Nizhidao	0.385	0.096	0.087	0	125.422	74.586	Emotion-projecting
Sentence-final	Nizhidao	0.466875949	0.120525316	0.083897468	0	159.3524639	71.81272627	Emotion-projecting
Sentence-final	Nizhidao	0.289	0.072	0.109	0	174.037	79.594	Emotion-projecting
Sentence-final	Nizhidao	0.326	0.092	0	0	275.709	78.632	Emotion-projecting
Sentence-final	Nizhidao	0.63	0.158	0	0	171.154	78.954	Emotion-projecting
Sentence-final	Nizhidao	0.743	0.193	0.358	0	122.507	76.24	Emotion-projecting
Sentence-final	Nizhidao	0.381	0.127	0	0	234.519	74.612	Emotion-projecting
Sentence-final	Nizhidao	0.443	0.111	0	0	95.196	67.171	Emotion-projecting
Sentence-final	Nizhidao	0.462	0.116	0.088	0	174.567	60.498	Emotion-projecting
Sentence-final	Nizhidao	0.316	0.105	0.448	0	86.453	58.863	Emotion-projecting
Sentence-final	Nizhidao	0.373	0.093	0	0	61.026	70.528	Emotion-projecting
Sentence-final	Nizhidao	0.399	0.1	0	0	95.994	80.106	Emotion-projecting
Sentence-final	Nizhidao	0.41	0.103	0	0	87.837	79.88	Emotion-projecting
Sentence-final	Nizhidao	0.367	0.092	0.643	0	84.246	77.318	Emotion-projecting
Sentence-final	Nizhidao	0.452	0.113	0	0	159.608	81.664	Emotion-projecting
Sentence-final	Nizhidao	0.604	0.151	0	0	76.695	74.074	Emotion-projecting
Sentence-final	Nizhidao	0.41	0.103	1.497	0	97.124	61.037	Emotion-projecting
Sentence-final	Nizhidao	0.361	0.09	0.836	0	86.207	61.187	Emotion-projecting
Sentence-final	Nizhidao	0.28	0.093	0.68	0	135.553	74.73	Emotion-projecting
Sentence-final	Nizhidao	0.427	0.107	0	0	149.036	73.458	Emotion-projecting
Sentence-final	Nizhidao	0.17	0.057	0.926	0	78.64	58.178	Emotion-projecting
Sentence-final	Nizhidao	0.123	0.031	0.865	0	103.352	54.14	Emotion-projecting
Sentence-final	Nizhidao	0.777	0.194	0	0	82.474	55.236	Emotion-projecting
Sentence-final	Nizhidao	0.394	0.099	0.968	0	113.786	78.616	Emotion-projecting
Sentence-final	Nizhidao	0.191	0.048	0	0	149.797	76.233	Emotion-projecting
Sentence-final	Nizhidao	0.247	0.062	0.831	0	96.51	62.274	Emotion-projecting
Sentence-final	Nizhidao	0.255	0.084	1.026	0	84.128	53.83	Emotion-projecting
Sentence-final	Nizhidao	0.222	0.074	0.968	0	83.371	56.073	Emotion-projecting
Sentence-final	Nizhidao	0.217	0.072	0.773	0	88.141	58.79	Emotion-projecting
Sentence-final	Nizhidao	0.307	0.102	1.264	0	87.253	58.653	Emotion-projecting
Sentence-final	Nizhidao	0.283	0.094	1.068	0	92.928	62.313	Emotion-projecting
Sentence-final	Nizhidao	0.256	0.064	0	0	85.685	59.421	Emotion-projecting
Sentence-final	Nizhidao	0.263	0.066	0.543	0	83.989	57.536	Emotion-projecting
Sentence-final	Nizhidao	0.282	0.094	0.883	0	82.458	58.265	Emotion-projecting
Sentence-final	Nizhidao	0.18	0.045	1.486	0	81.219	55.037	Emotion-projecting
Sentence-final	Nizhidao	0.257	0.064	1.568	0	90.964	60.874	Emotion-projecting
Sentence-final	Nizhidao	0.354	0.089	1.601	0	90.186	71.964	Emotion-projecting
Sentence-final	Nizhidao	0.451	0.113	0	0	105.444	74.437	Emotion-projecting
Sentence-final	Nizhidao	0.295	0.074	1.042	0	99.942	75.137	Emotion-projecting
Sentence-final	Nizhidao	0.428	0.143	0.147	0	141.715	70.233	Emotion-projecting
Sentence-final	Nizhidao	0.601	0.2	0.885	0	115.417	86.745	Emotion-projecting
Sentence-final	Nizhidao	0.325	0.081	0	0	88.134	73.47	Emotion-projecting
Sentence-final	Nizhidao	0.353	0.118	0.504	0	95.593	71.535	Emotion-projecting
Sentence-final	Nizhidao	0.365	0.091	0.616	0	84.731	71.218	Emotion-projecting
Sentence-final	Nizhidao	0.508	0.169	0.965	0	131.863	70.213	Emotion-projecting
Sentence-final	Nizhidao	0.235	0.059	0.72	0	240.547	82.15	Emotion-projecting
Sentence-final	Nizhidao	0.277	0.092	0.48	0	83.822	79.665	Emotion-projecting
Sentence-final	Nizhidao	0.579	0.145	0	0	94.01	77.768	Emotion-projecting
Sentence-final	Nizhidao	0.366	0.122	0	0	123.828	76.949	Emotion-projecting
Sentence-final	Nizhidao	0.526	0.157	1	0	90.685	78.875	Emotion-projecting
Sentence-final	Nizhidao	0.407	0.102	0	0	103.25	78.602	Emotion-projecting
Sentence-final	Nizhidao	0.513	0.128	0.318	0	118.785	69.511	Emotion-projecting
Sentence-final	Nizhidao	0.46	0.153	0.141	0	121.118	80.422	Emotion-projecting
Sentence-final	Nizhidao	0.59	0.148	0.142	0	227.856	79.469	Emotion-projecting
Sentence-final	Nizhidao	0.59	0.148	0	0	106.006	75.847	Emotion-projecting
Sentence-final	Nizhidao	0.695	0.174	0	0	177.954	82.375	Emotion-projecting
Sentence-final	Nizhidao	0.545	0.136	0	0	109.047	77.369	Emotion-projecting
Sentence-final	Nizhidao	0.367	0.092	0	0	171.484	83.039	Emotion-projecting
Sentence-final	Nizhidao	0.655	0.164	0	0	159.319	83.851	Emotion-projecting
Sentence-final	Nizhidao	0.558	0.14	0	0	89.187	75.658	Emotion-projecting
Sentence-final	Nizhidao	0.387	0.097	0	0	148.748	67.198	Emotion-projecting
Sentence-final	Nizhidao	0.699	0.175	0	0	184.213	70.477	Emotion-projecting
Sentence-final	Nizhidao	0.465	0.116	0	0	183.095	70.632	Emotion-projecting
Sentence-final	Nizhidao	0.6	0.15	0	0	186.783	64.477	Emotion-projecting
Sentence-final	Nizhidao	0.674	0.169	0	0	183.176	67.797	Emotion-projecting
Sentence-final	Nizhidao	0.481	0.12	0	0	195.8	67.787	Emotion-projecting
Sentence-final	Nizhidao	0.515	0.129	0.141	0	228.428	76.484	Emotion-projecting
Sentence-final	Nizhidao	0.471	0.118	0	0	179.789	76.61	Emotion-projecting
Sentence-final	Nizhidao	0.224	0.056	0	0	186.524	69.299	Emotion-projecting
Sentence-final	Nizhidao	0.505	0.126	0	0	235.728	73.794	Emotion-projecting
Sentence-final	Nizhidao	0.362	0.091	0	0	100.291	55.632	Emotion-projecting
Sentence-final	Nizhidao	0.385	0.096	0	0	103.095	51.417	Emotion-projecting
Sentence-final	Nizhidao	0.296	0.074	0	0	109.137	57.415	Emotion-projecting
Sentence-final	Nizhidao	0.362	0.091	0	0	91.018	56.132	Emotion-projecting
Sentence-final	Nizhidao	0.368	0.092	0.32	0	149.239	68.004	Emotion-projecting
Sentence-final	Nizhidao	0.364	0.091	0	0	177.578	63.064	Emotion-projecting
Sentence-final	Nizhidao	0.252	0.063	0	0	101.044	62.627	Emotion-projecting
Sentence-final	Nizhidao	0.615	0.154	0	0	259.008	87.427	Emotion-projecting
Sentence-final	Nizhidao	0.45	0.113	0	0	89.898	81.366	Emotion-projecting
Sentence-final	Nizhidao	0.687	0.199	0	0	244.352	74.408	Emotion-projecting
Sentence-final	Nizhidao	0.373	0.093	0.159	0	239.422	81.718	Emotion-projecting
Sentence-final	Nizhidao	0.385	0.096	0.087	0	125.422	74.586	Emotion-projecting
Sentence-final	Nizhidao	0.466875949	0.120525316	0.083897468	0	159.3524639	71.81272627	Emotion-projecting
